# Supplementary material for: Association Between Plasma Amyloid-β and Neuropsychological Performance in Patients With Cognitive Decline
Source: Front Aging Neurosci. 2021 Oct 25;13:736937. doi: 10.3389/fnagi.2021.736937 (PMC8573146; doi:10.3389/fnagi.2021.736937)
Supplement: Supplementary file 1 [file Data_Sheet_1.docx]

Association between plasma amyloid-β and neuropsychological performance in patients with cognitive decline

**Gyihyaon Yun1†, Hye Jin Kim2†, Hyug-Gi Kim3, Kyung Mi Lee3, Il Ki Hong4,** **Sang Hoon Kim5, Hak Young Rhee6, Geon-Ho Jahng7, Sung Sang Yoon1, Key-Chung Park1, Kyo Seon Hwang2*, and Jin San Lee1***

Departments of 1Neurology, 3Radiology, and 4Nuclear Medicine, and 5Otorhinolaryngology, Head and Neck Surgery, Kyung Hee University Hospital, Kyung Hee University College of Medicine, Seoul, Republic of Korea

2Department of Clinical Pharmacology and Therapeutics, Kyung Hee University College of Medicine, Seoul, Republic of Korea

Departments of 6Neurology and 7Radiology, Kyung Hee University Hospital at Gangdong, Kyung Hee University College of Medicine, Seoul, Republic of Korea

†These authors contributed equally to this work.

*** Correspondence:**Jin San Lee, MD, PhD
xpist@naver.com

Kyo Seon Hwang, PhD

k.hwang@khu.ac.kr

**Running Title:** Plasma Amyloid-β and Neuropsychological Performance

**Supplementary data:** Supplementary Methods, Supplementary Results (Supplementary Table 1)

# Supplementary Methods

## Reagents and Materials

Sulfuric acid (H2SO4, 98%), hydrogen peroxide (H2O2, 35%), and isopropyl alcohol (IPA, 99.7%) were purchased from Daejung Chemical & Metals Co. Ltd. (Gyeonggi-do, Korea). 3-(ethoxydimethylsilyl) propylamine (APMES, 97%), *N*-(3-dimethyl aminopropyl)-*N*-ethylcarbodiimide hydrochloride (EDC, molecular weight [MW]: 155.249 g/mol), *N*-hydroxysuccinimide (NHs, MW: 115.09 g/mol), and glutaraldehyde solution (50 wt%) were purchased from Sigma-Aldrich (St. Louis, MO). We purchased 100 mM phosphate-buffered saline (PBS, pH 7.4) from Corning Korea Co. Ltd., (Seoul, Korea), and 0.2 M 2-morpholinoethanesulfonic acid monohydrate (MES, pH 5.5) buffer from Thermo Fisher Scientific (Waltham, MA). Standard human plasma was purchased from Sigma-Aldrich (cat. no. P9525). Polydimethylsiloxane (SYLGARD 184 A/B) was purchased from Dowhitech Silicone Co. Ltd. (Gyeonggi-do, Korea). All reagents and solvents were used as received without further purification. The distilled water used in all experiments had a resistivity higher than 18 MΩ·cm-1 from the AquaMAX Ultra 370 series (Young In Chromass Co., Gyeonggi-do, Korea). Aβ protein fragments 1–40 (Aβ40) and 1-42 (Aβ42), with a MW of approximately 4.5 kDa and human hemoglobin were purchased from Sigma-Aldrich. Purified anti-Aβ 1–40 (11A50–B10) antibody and purified anti-Aβ 1–42 (12F4) antibody, which were specific for the isoform ending at the 40th and 42nd amino acids of Aβ42, respectively, were purchased from BioLegend (San Diego, CA).

# Supplementary Results

## Estimations of plasma Aβ levels in the NC and AD groups

**Supplementary Table 1** Estimations of plasma Aβ levels in the NC and AD groups

| **Levels of Aβ**  **in the NC group’s plasma [fg/mL]** | | | | **Levels of Aβ**  **in the AD group’s plasma [fg/mL]** | | | |
| --- | --- | --- | --- | --- | --- | --- | --- |
| **Sample #** | **Aβ40** | **Aβ42** | **Aβ42/40** | **Sample #** | **Aβ40** | **Aβ42** | **Aβ42/40** |
| 1 | 64.40 | 715.5 | 11.11 | 1 | 11.31 | 534.1 | 47.22 |
| 2 | 1.970 | 17.45 | 8.86 | 2 | 34.60 | 5,434 | 157.05 |
| 3 | 73.37 | 266.0 | 3.63 | 3 | 66.32 | 81,204 | 1224.43 |
| 4 | 3,024 | 807.9 | 0.27 | 4 | 155.7 | 3.485 | 0.02 |
| 5 | 56.73 | 474.6 | 8.37 | 5 | 0.456 | 2,911 | 6383.77 |
| 6 | 8.361 | 6.914 | 0.83 | 6 | 482.3 | 294,819 | 611.28 |
| 7 | 16.71 | 34.71 | 2.08 | 7 | 0.338 | 36.52 | 108.05 |
| 8 | 82.08 | 91.73 | 1.12 | 8 | 5.034 | 366.7 | 72.84 |
| 9 | 59.16 | 13.36 | 0.23 | 9 | 1.803 | 757.9 | 420.35 |
| 10 | 4.741 | 6.824 | 1.44 | 10 | 62.51 | 6,301 | 100.80 |
| 11 | 630.7 | 11,239 | 17.82 | 11 | 1.552 | 52.83 | 34.04 |
| 12 | 817.9 | 1,078 | 1.32 | 12 | 18.22 | 8,811 | 483.59 |
| 13 | 3.877 | 12.06 | 3.11 | 13 | 39.09 | 1,672 | 42.77 |
| 14 | 228.6 | 11.19 | 0.05 | 14 | 29.46 | 415.1 | 14.09 |
| 15 | 216.6 | 694.9 | 3.21 | 15 | 4.258 | 126.0 | 29.59 |
| 16 | 11.51 | 188.8 | 16.40 | 16 | 151.5 | 9,059 | 59.80 |
| 17 | 6.328 | 71.40 | 11.28 | 17 | 4.296 | 6.520 | 1.52 |
| 18 | 58.85 | 433.7 | 7.37 | 18 | 11.72 | 1,663 | 141.89 |
| 19 | 1,639 | 9,792 | 5.97 | 19 | 2.137 | 314.9 | 147.36 |
| 20 | 3.390 | 3.847 | 1.13 |  | | | |
| 21 | 21.04 | 1,026 | 48.76 |
| 22 | 104.9 | 185.7 | 1.77 |
| 23 | 131.5 | 26.47 | 0.20 |
| 24 | 182.1 | 588.4 | 3.23 |
| 25 | 1,147 | 138.2 | 0.12 |

Aβ, amyloid-β; NC, normal control; AD, Alzheimer’s disease.
